# Supplementary material for: Viral Metagenomics Reveals a Putative Novel HPV Type in Anogenital Wart Tissues
Source: MDPI journal article supplement (doi:10.3390/pathogens11121452), 2022-12-01
Supplement: s1 [file s1]

**Supplementary Table S1. The other HPV types identified in the 110 wart samples**

| <b>Genus</b>         | <b>Species</b>         | <b>Serotype</b>                      |
|----------------------|------------------------|--------------------------------------|
| Alphapapillomavirus  | Alphapapillomavirus 1  | HPV32                                |
|                      | Alphapapillomavirus 3  | HPV62, HPV81, HPV84                  |
|                      | Alphapapillomavirus 4  | HPV27b, HPV57b, HPV57c               |
|                      | Alphapapillomavirus 5  |                                      |
|                      | Alphapapillomavirus 6  | HPV39, HPV53                         |
|                      | Alphapapillomavirus 7  | HPV45, HPV59, HPV68b                 |
|                      | Alphapapillomavirus 8  | HPV7, HPV40, HPV43, HPV91            |
|                      | Alphapapillomavirus 9  | HPV31, HPV35, HPV52,<br>HPV58, HPV67 |
|                      | Alphapapillomavirus 10 | HPV6, HPV11, HPV44, HPV74            |
|                      | Alphapapillomavirus 14 | HPV90                                |
| Gamma papillomavirus | Gamma papillomavirus 6 | HPV108                               |
